# Supplementary material for: A New SMAD4 Splice Site Variant in a Three-Generation Italian Family with Juvenile Polyposis Syndrome
Source: MDPI journal article supplement (doi:10.3390/diagnostics12112684), 2022-11-04
Supplement: s1 [file s1]

| Gene          | Reference sequence | Chr   | Locus     |           | Gene uniformity |
|---------------|--------------------|-------|-----------|-----------|-----------------|
|               |                    |       | start     | end       |                 |
| <i>ATM</i>    | NM_000051.3        | chr11 | 108117686 | 108236240 | 97.43%          |
| <i>PALB2</i>  | NM_024675.3        | chr16 | 23614775  | 23649278  | 100%            |
| <i>MRE11A</i> | NM_005591.3        | chr11 | 94203632  | 94163157  | 100%            |
| <i>RAD50</i>  | NM_005732.3        | chr5  | 131977865 | 131944422 | 100%            |
| <i>BARD1</i>  | NM_000465.3        | chr2  | 215593395 | 215646238 | 100%            |
| <i>NBN</i>    | NM_002485.4        | chr8  | 90990443  | 90982790  | 99.22%          |
| <i>BRIP1</i>  | NM_032043.2        | chr17 | 59763192  | 59858371  | 96.28%          |
| <i>RAD51C</i> | NM_058216.2        | chr17 | 56809840  | 56787356  | 100%            |
| <i>RAD51D</i> | NM_001142571.2     | chr17 | 33434380  | 33446637  | 99.99%          |
| <i>STK11</i>  | NM_000455.4        | chr19 | 1220575   | 1223176   | 94.69%          |
| <i>MSH2</i>   | NM_000251.2        | chr2  | 47630326  | 47637516  | 99.99%          |
| <i>MLH1</i>   | NM_000249.3        | chr3  | 37053497  | 37070428  | 100%            |
| <i>MSH6</i>   | NM_000179.2        | chr2  | 48010368  | 48033795  | 99.49%          |
| <i>PMS2</i>   | NM_000535.6        | chr7  | 6045518   | 6037059   | 100%            |
| <i>EPCAM</i>  | NM_002354.2        | chr2  | 47596640  | 47606198  | 95.35%          |
| <i>MUTYH</i>  | NM_001128425.1     | chr1  | 45798430  | 45800188  | 93.4%           |
| <i>RECQL1</i> | NM_032941.2        | chr12 | 21627770  | 21652509  | 91.39%          |
| <i>TP53</i>   | NM_000546.5        | chr17 | 7576532   | 7578294   | 99.35%          |
| <i>PTEN</i>   | NM_000314.6        | chr10 | 89711870  | 89725234  | 82.32%          |
| <i>CHEK2</i>  | NM_007194.3        | chr22 | 29091693  | 29121117  | 98.88%          |
| <i>CDH1</i>   | NM_004360.4        | chr16 | 68862072  | 68856133  | 98.34%          |
| <i>CDK4</i>   | NM_000075.3        | chr12 | 58143232  | 58145130  | 100%            |
| <i>CDKN2A</i> | NM_001195132.1     | chr9  | 21970896  | 21968775  | 99.56%          |
| <i>SMAD4</i>  | NM_005359.5        | chr18 | 48591788  | 48593562  | 100%            |
| <i>APC</i>    | NM_000038.5        | chr5  | 112111321 | 112163708 | 100%            |

**Supplementary Table S1:** Custom Panel were designed with Ampliseq Designer V.7.0 (<https://ampliseq.com/protected/startPage.action>); features: 25 genes, 610 amplicons with size range 125-275 bp and size: 113.732 Kb; Reference Sequence from <https://www.ncbi.nlm.nih.gov/refseq/>; chr: chromosome
